# Supplementary material for: Proportion of Chromosomal Disorders and Their Patterns among Births with Congenital Anomalies in Africa: A Systematic Review and Meta-Analyses
Source: ScientificWorldJournal. 2022 Dec 13;2022:6477596. doi: 10.1155/2022/6477596 (PMC9767725; doi:10.1155/2022/6477596)
Supplement: Supplementary Materials — Figure S1: Sensitivity analysis on the pooled proportion of chromosomal disorders among births with congenital anomalies in Africa from January, 2000 to October, 2021. Figure S2: Funnel plot on the pooled proportion of chromosomal disorders among births with congenital anomalies in Africa from January, 2000 to October, 2021. Figure S3. Forest plot on the pooled proportion of Down syndrome (Trisomy, 21) among births with congenital anomalies in Africa from January, 2000 to October, 2021. Figure S4: Forest plot on the pooled proportion of Edwards' syndrome (Trisomy, 18) among births with congenital anomalies in Africa from January, 2000 to October, 2021. Figure S5: Forest plot on the pooled proportion of Patau Syndrome (Trisomy, 13) among births with congenital anomalies in Africa from January, 2000 to October, 2021. Figure S6: Forest plot on the pooled proportion of Turner syndrome among births with congenital anomalies in Africa from January, 2000 to October, 2021. Figure S7: Forest plot on the pooled proportion of chromosomal deletions among births with congenital anomalies in Africa from January, 2000 to October, 2021. Figure S8: Forest plot on the pooled proportion of unclassified chromosomal disorders among births with congenital anomalies in Africa from January, 2000 to October, 2021. [file 6477596.f1.zip › supplementary figures-.pdf]

| Study omitted | Estimate  | [95% Conf. Interval] |
|---------------|-----------|----------------------|
| 1             | 9.0552406 | 7.1033344 11.007148  |
| 2             | 8.9962721 | 7.0294671 10.963077  |
| 3             | 9.0544472 | 7.1066952 11.002199  |
| 4             | 9.0343199 | 7.0951576 10.973483  |
| 5             | 9.0551481 | 7.0989285 11.011368  |
| 6             | 8.9641027 | 7.0253143 10.90289   |
| 7             | 9.0704184 | 7.1215038 11.019333  |
| 8             | 9.000844  | 7.0577192 10.943969  |
| 9             | 8.84126   | 6.906549 10.775971   |
| 10            | 8.9757643 | 7.041688 10.909841   |
| 11            | 8.967577  | 7.0249238 10.91023   |
| 12            | 9.0113268 | 7.0695229 10.953132  |
| 13            | 8.9230976 | 6.9877601 10.858436  |
| 14            | 9.0547943 | 7.1105013 10.999088  |
| 15            | 8.9928493 | 7.0523167 10.933383  |
| 16            | 8.9914112 | 7.049427 10.933396   |
| 17            | 8.9723978 | 7.0294032 10.915393  |
| 18            | 8.0547733 | 6.7230206 9.3865252  |
| 19            | 9.0820007 | 7.1368995 11.027102  |
| 20            | 9.0747786 | 7.1311755 11.018382  |
| 21            | 9.0722427 | 7.1266356 11.017849  |
| 22            | 9.0568504 | 7.0016909 11.112009  |
| 23            | 8.9118996 | 6.9743643 10.849435  |
| 24            | 8.9738808 | 7.0334435 10.914317  |
| 25            | 8.6854811 | 6.7537031 10.617258  |
| 26            | 8.9561625 | 7.0178413 10.894484  |
| 27            | 9.0948296 | 7.1405787 11.049082  |
| 28            | 8.9512053 | 6.9789171 10.923493  |
| 29            | 8.811655  | 6.874783 10.748528   |
| 30            | 9.067296  | 7.1137009 11.02089   |
| 31            | 9.0457144 | 7.0986338 10.992794  |
| 32            | 9.0820007 | 7.1368995 11.027102  |
| 33            | 9.1280079 | 7.1233306 11.132686  |
| 34            | 9.0040636 | 7.0655036 10.942623  |
| 35            | 8.9813299 | 7.0415149 10.921145  |
| 36            | 8.877739  | 6.9397497 10.815728  |
| 37            | 8.9956856 | 7.0529637 10.938408  |
| 38            | 8.7508888 | 6.818481 10.683296   |
| 39            | 9.1456604 | 7.1180243 11.173296  |
| 40            | 8.9990444 | 6.9404798 11.057609  |
| 41            | 9.0343199 | 7.0951576 10.973483  |
| 42            | 9.0067024 | 7.0635648 10.94984   |
| 43            | 8.7171831 | 6.7839108 10.650456  |
| 44            | 8.2639122 | 6.35394 10.173884    |
| 45            | 8.9520473 | 7.0133467 10.890747  |
| 46            | 8.5143785 | 6.5889864 10.439771  |
| 47            | 8.4704933 | 6.5471292 10.393857  |
| 48            | 9.000967  | 7.0543885 10.947545  |
| 49            | 8.9990005 | 7.0587559 10.939245  |
| 50            | 8.885725  | 6.9501958 10.821254  |
| 51            | 8.8032541 | 6.8679171 10.738592  |
| 52            | 9.0367746 | 7.0974026 10.976147  |
| 53            | 8.8666258 | 6.9262738 10.806978  |
| 54            | 8.9026699 | 6.9633799 10.84196   |
| 55            | 9.0075321 | 7.0654058 10.949659  |
| 56            | 8.9659977 | 7.0265117 10.905484  |
| 57            | 8.8783045 | 6.9370365 10.819571  |
| 58            | 9.0015812 | 7.0632024 10.93996   |
| 59            | 9.0631418 | 7.108747 11.017535   |
| 60            | 9.0024977 | 7.0620384 10.942957  |
| 61            | 8.9399633 | 7.0175343 10.862392  |
| 62            | 8.9399633 | 7.0175343 10.862392  |
| 63            | 8.9399633 | 7.0175343 10.862392  |
| 64            | 8.9399633 | 7.0175343 10.862392  |
| 65            | 8.9399633 | 7.0175343 10.862392  |
| 66            | 8.9399633 | 7.0175343 10.862392  |
| 67            | 8.9399633 | 7.0175343 10.862392  |
| Combined      | 8.9399635 | 7.0175343 10.862393  |

Figure S1: Sensitivity analysis on the pooled proportion of chromosomal disorders among births with congenital anomalies in Africa from January, 2000-October, 2021.

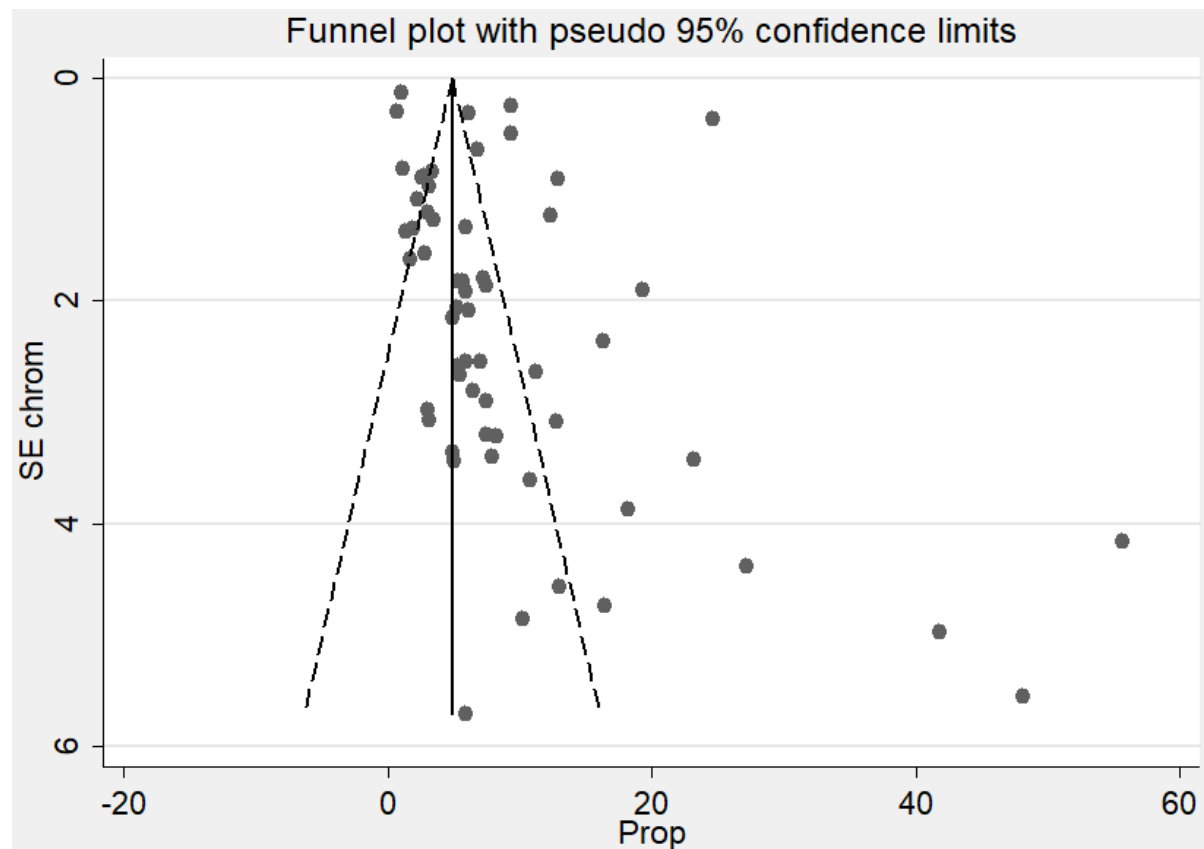

Figure S2: Funnel plot on the pooled proportion of chromosomal disorders among births with congenital anomalies in Africa from January 2000-October, 2021.

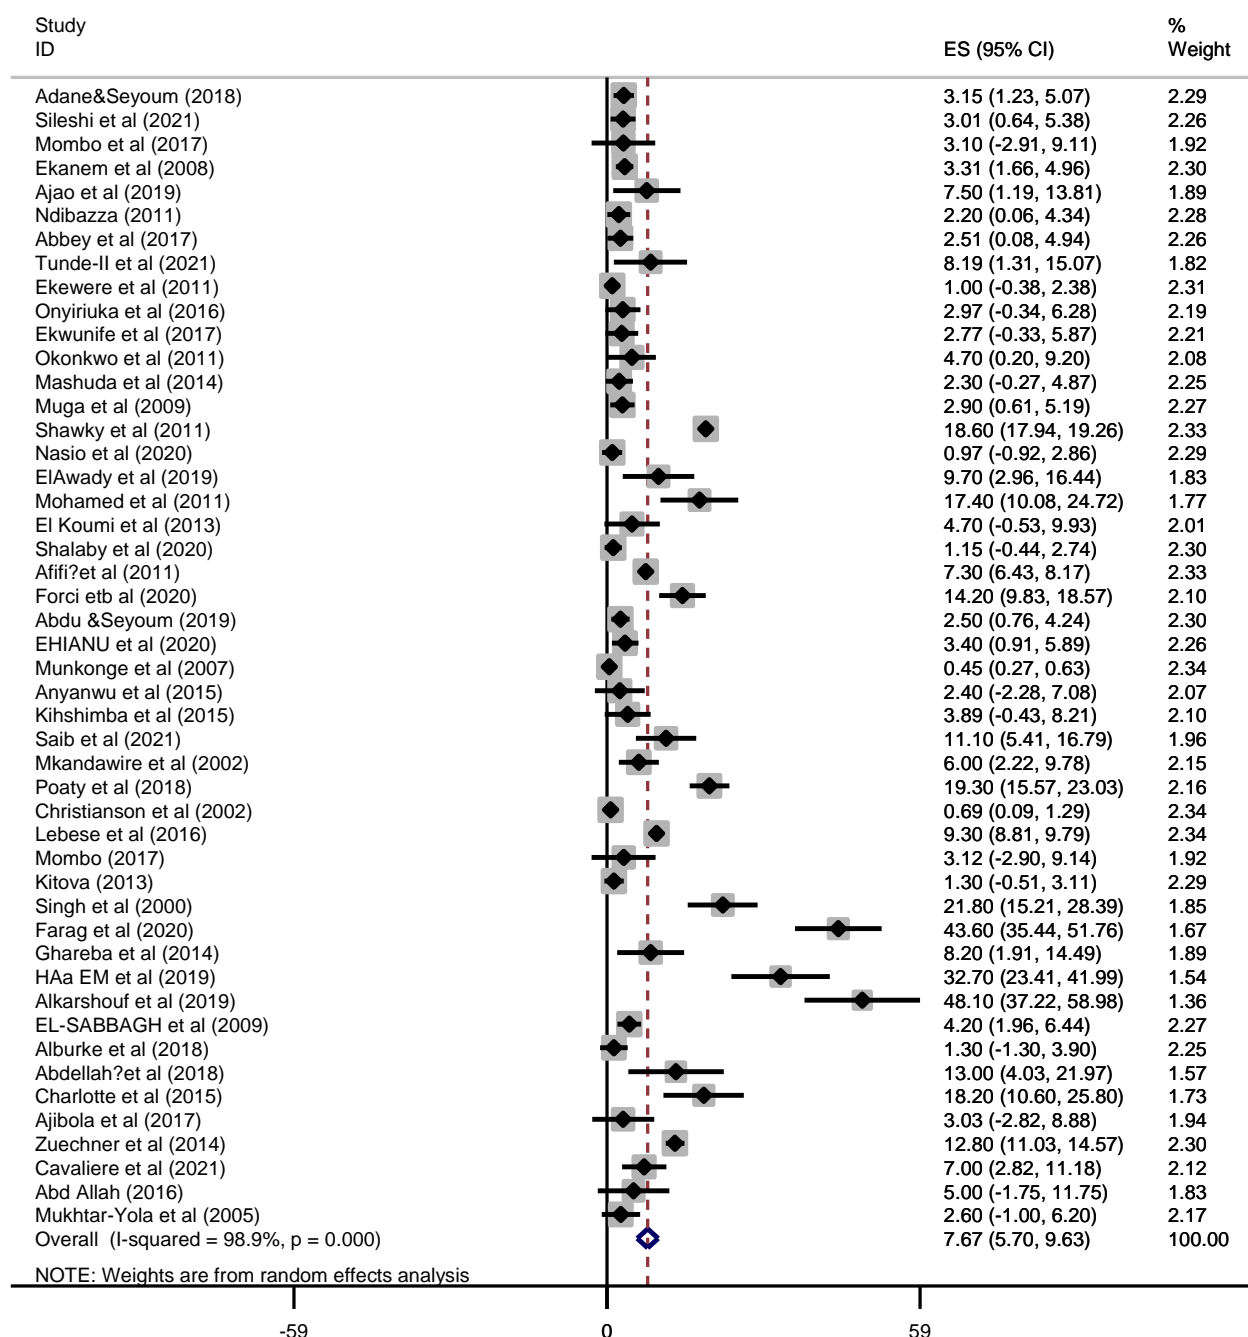

Figure S3. Forest plot on the pooled proportion of Down syndrome (Trisomy, 21) among births with congenital anomalies in Africa from January 2000-October, 2021

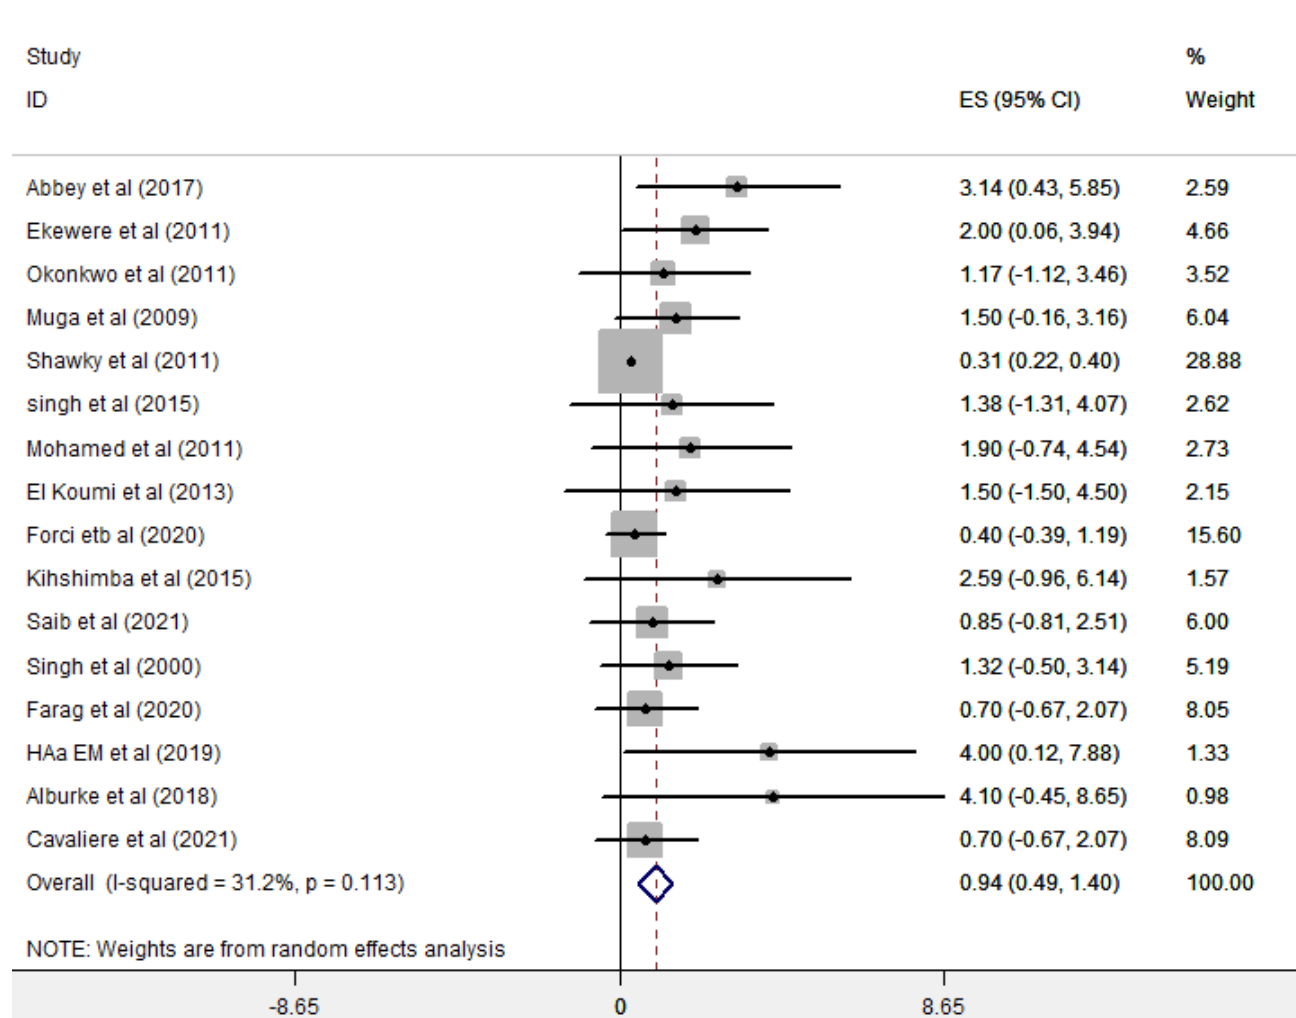

Figure S4: Forest plot on the pooled proportion of Edwards Syndrome (Trisomy, 18) among births with congenital anomalies in Africa from January 2000-October, 2021

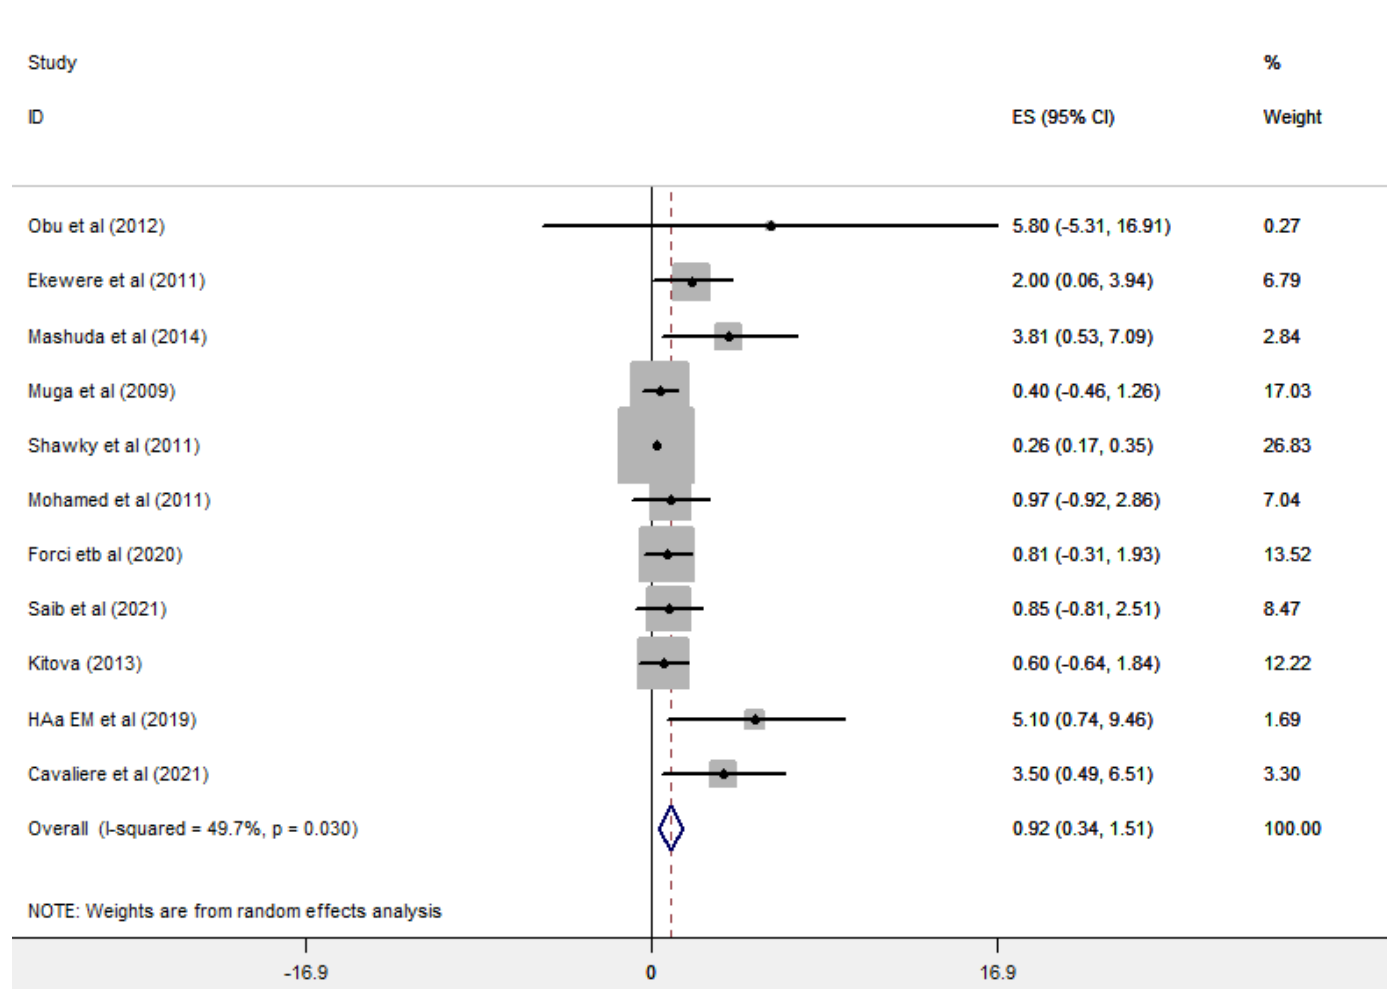

Figure S5: Forest plot on the pooled proportion of Patau Syndrome (Trisomy, 13) among births with congenital anomalies in Africa from January 2000-October, 2021

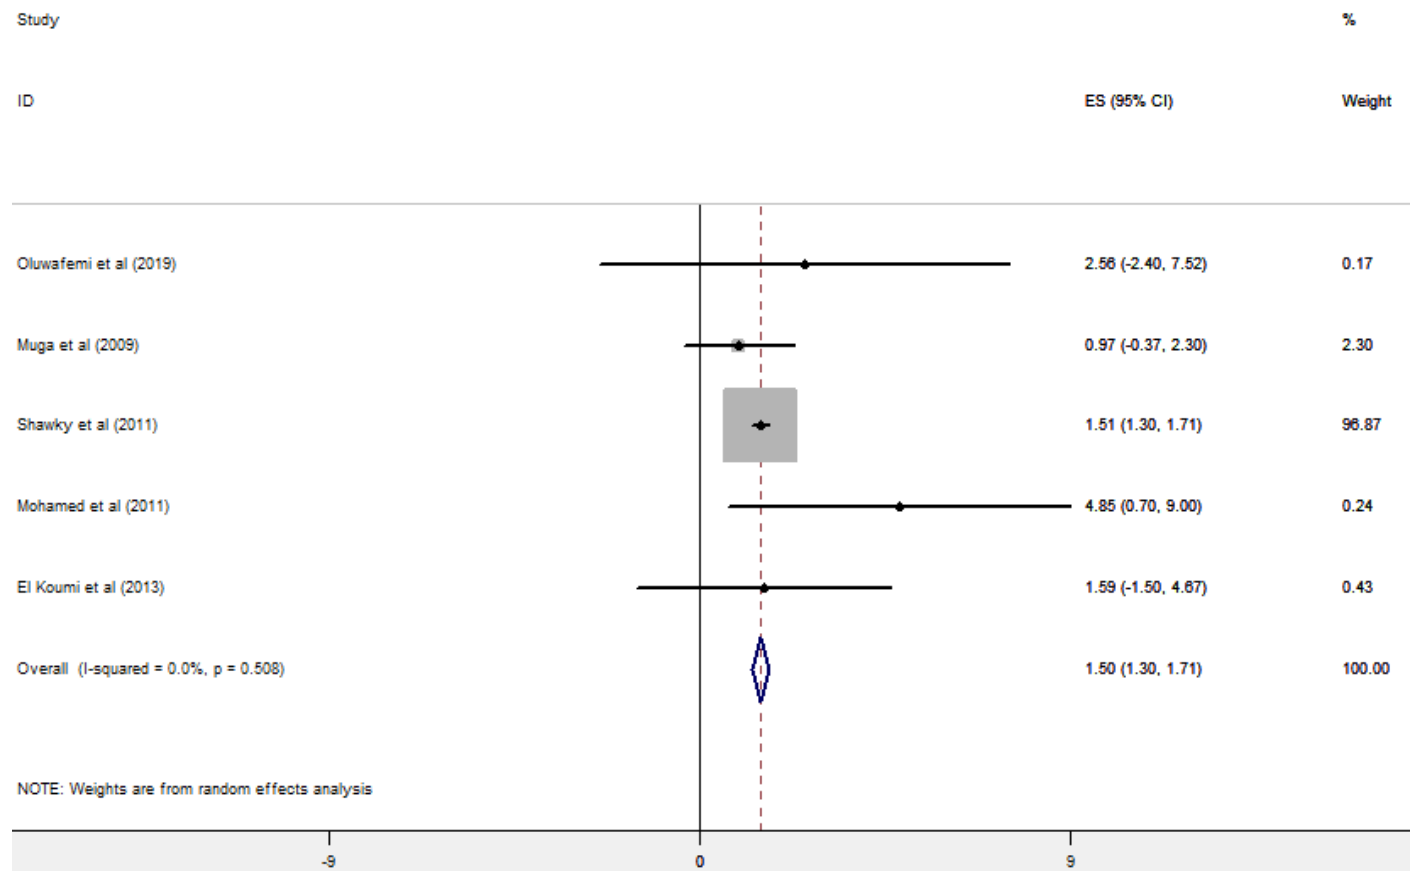

Figure S6: Forest plot on the pooled proportion of Turners syndrome among births with congenital anomalies in Africa from January 2000-October, 2021

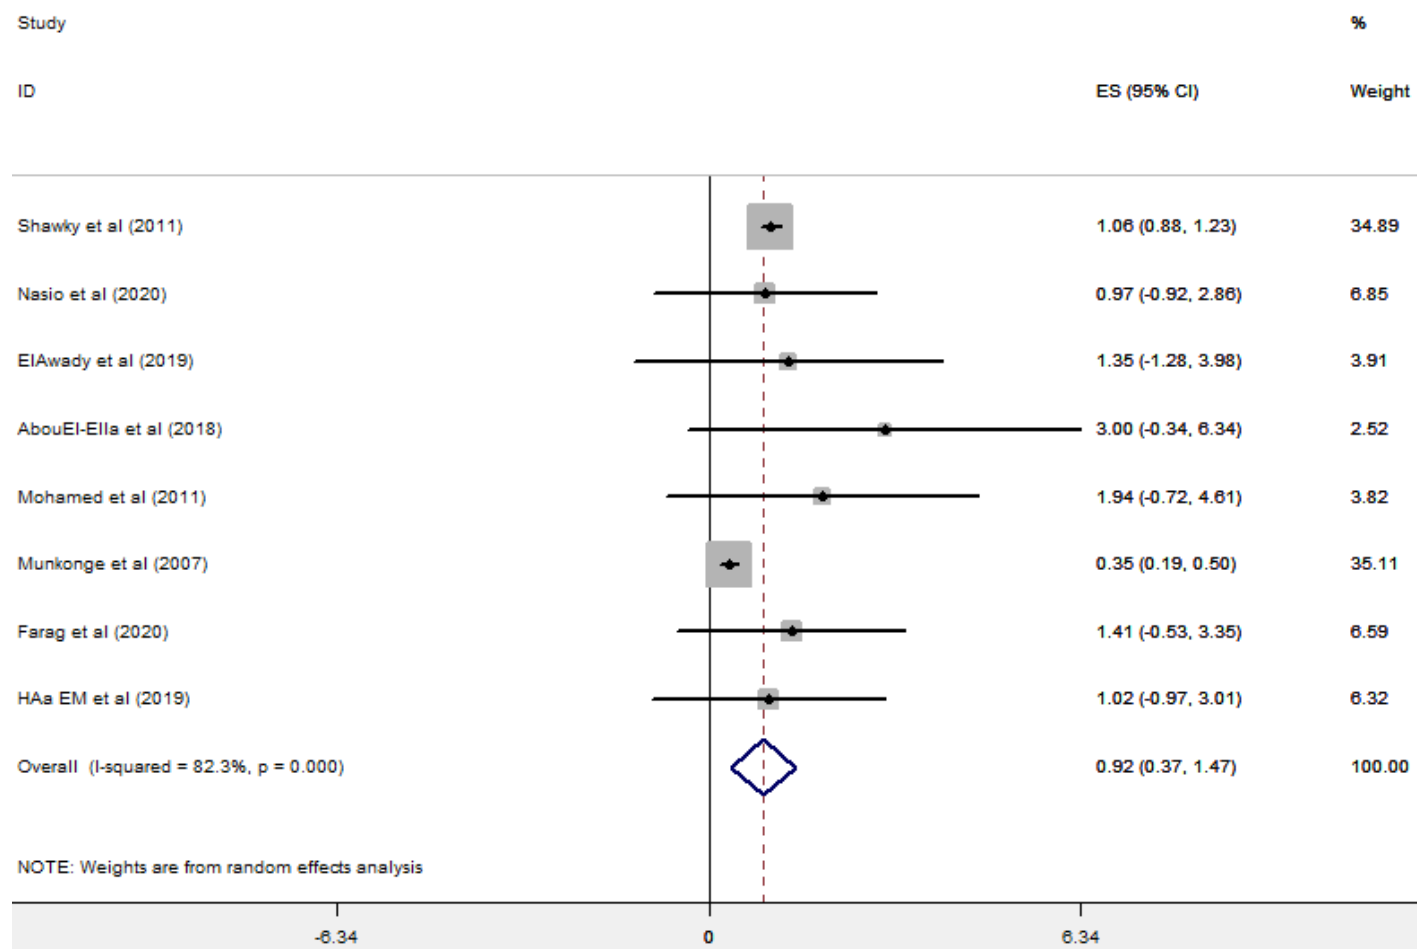

Figure S7: Forest plot on the pooled proportion of chromosomal deletions among births with congenital anomalies in Africa from January 2000-October, 2021

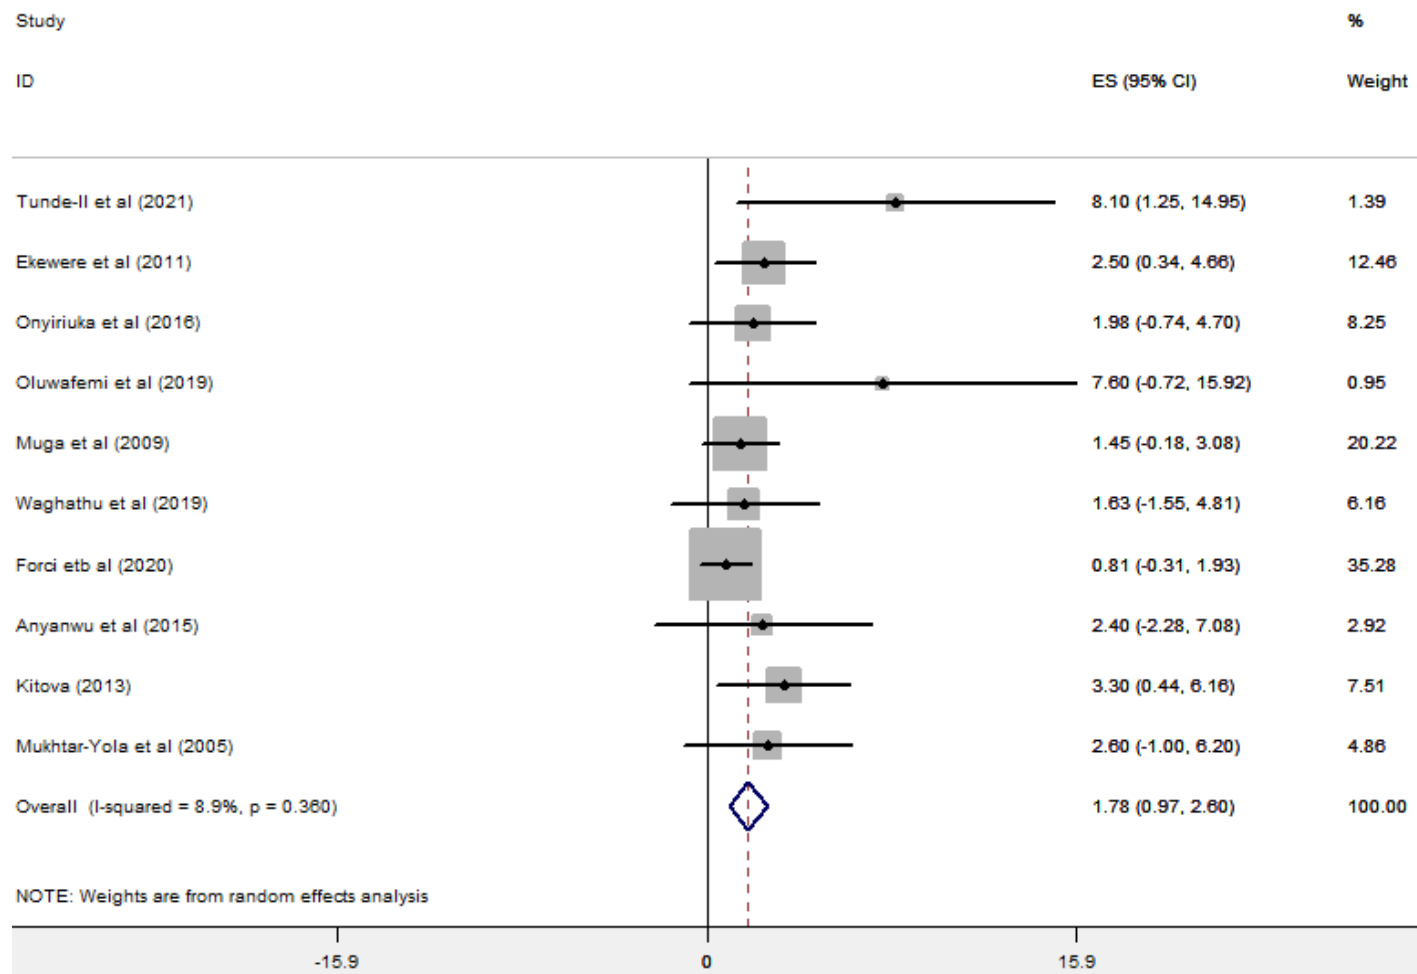

Figure S8: Forest plot on the pooled proportion of unclassified chromosomal disorders among births with congenital anomalies in Africa from January 2000-October, 2021
